# Supplementary material for: Assessment of Right Ventricular Function With CT and Echocardiography in Patients With Severe Acute Respiratory Distress Syndrome on Extracorporeal Membrane Oxygenation
Source: PubMed Central journal article supplement — Crit Care Explor. 2021 Feb 22;3(2):e0345. doi: 10.1097/CCE.0000000000000345 (PMC7901809; doi:10.1097/cce.0000000000000345), 2021-02-22
Supplement: cc9-3-e0345-s001.pdf [file cc9-3-e0345-s001.pdf]

## SUPPLEMENT

### **Assessment of right ventricular function with CT and Echocardiography in patients with severe ARDS on ECMO**

#### **Authors:**

Dr Dominik J. VOGEL, MD, EDIC, 1

Dr Ambra FABBRI, MD, 1

Dr Andrea FALVO, MD, 1

Dr Jonah POWELL-TUCK, MBBCH, MRCP FFICM, 1

Dr Nishita DESAI, MBBS, MRCP FFICM, 1

Dr Francesco VASQUES, MD, 1

Dr Chris MEADOWS, MBBS, FRCP FRCA FFICM, 1,2

Dr Nicholas IOANNOU, MBBS, MA FRCP FRCA FFICM 1

Dr Guy GLOVER, MBChB, FRCA FFICM, 1

Dr Aimée BRAME, PhD, FRCP EDIC FFICM, 1,3

Dr Peter SHERREN, MBBS, FRCA FFICM EDIC RCSed, 1

Dr Andrew RETTER, MBBS, MRCP FRCPATH FFICM, 1

Dr Ronak RAJANI DM FRCP FESC FACC FSCCT, 4,

Dr Luigi CAMPOROTA, PhD, FRCP FFICM, 1,5

#### **Authors' Information:**

**1)** Intensive Care Unit, Guy's and St Thomas' NHS Foundation Trust, London, UK.

**2)** Faculty of Life Sciences & Medicine, King's College London, UK.

**3)** Pulmonary Hypertension, Royal Brompton Hospital, London, UK.

**4)** School of Biomedical Engineering and Imaging Sciences, King's College London, London, UK.

**5)** Centre of Human Applied Physiological Sciences, King's College London, London, UK.

## SUPPLEMENT

|          | Parameter                                               | Mean (SD)                 |
|----------|---------------------------------------------------------|---------------------------|
| MPAd     | Main pulmonary artery diameter (at bifurcation)         | 2.62cm (0.41)             |
| Aad      | Ascending aortic diameter                               | 2.82cm (0.41)             |
| MPAd/Aad | Ratio                                                   | 0.94 (0.15)               |
| RPAAd    | Right pulmonary artery diameter                         | 1.85cm (0.34)             |
| LPAAd    | Left pulmonary artery diameter                          | 1.90cm (0.31)             |
| Rad      | Right atrium transverse diameter                        | 3.85cm (0.63)             |
| RAA      | Right atrial area                                       | 15.1cm <sup>2</sup> (4.7) |
| Rvd      | Right ventricular transverse diameter                   |                           |
|          | - Rvd annulus                                           | 3.61cm (0.58)             |
|          | - Mid Rvd                                               | 3.36cm (0.66)             |
|          | - Apex Rvd                                              | 1.71cm (0.58)             |
| Rva      | Right ventricular area                                  | 18.8cm <sup>2</sup> (5.0) |
| RVOTW    | Right ventricular outflow tract anterior wall thickness | 0.42cm (0.12)             |
| IVST     | Interventricular septal thickness                       | 1.17cm (0.26)             |
| Lvd      | Left ventricular transverse diameter                    | 3.66cm (0.55)             |
| Lva      | Left ventricular area                                   | 24.5cm <sup>2</sup> (5.7) |
|          | Lung measurements                                       |                           |
|          | Lung volume with CPAP 5cmH <sub>2</sub> O               | 919ml (840)               |
|          | Lung volume with CPAP PEEP 45cmH <sub>2</sub> O         | 1978ml (1269)             |

*eTable 1: Showing CT measured dimensions of vasculature and cardiac chambers for all 107 patients. The vascular structures (main pulmonary artery diameter, right and left pulmonary artery diameter, ascending aorta diameter) were measured in a transversal image. Rad, Mid RVd, Lvd, RAA, RVA, Lva, RVd/LVd and RVa/Lva were measured after reset in a 3D Curved MPR plane, centred at the right atrium and oriented toward the apex. Lung volumes were measured in transversal view using lung filter, selecting Region of Interest (ROI) and merging aerated areas at different levels for low and high airway pressures, respectively. Variables are given as mean with standard deviation shown in brackets.*
